# Supplementary material for: Diverse immune response of DNA damage repair-deficient tumors
Source: PubMed Central journal article supplement (PMC8149377; doi:10.1016/j.xcrm.2021.100276), 2021-05-18
Supplement: mmc1.pdf [file mmc1.pdf]

**Cell Reports Medicine, Volume 2**

**Supplemental information**

**Diverse immune response of DNA  
damage repair-deficient tumors**

**Tao Qing, Tomi Jun, Katherine E. Lindblad, Amaia Lujambio, Michal Marczyk, Lajos Puztai, and Kuan-lin Huang**

## Partial Least Squares Path Modeling (PLS-PM) Jointly germline and somatic contribution to signatures

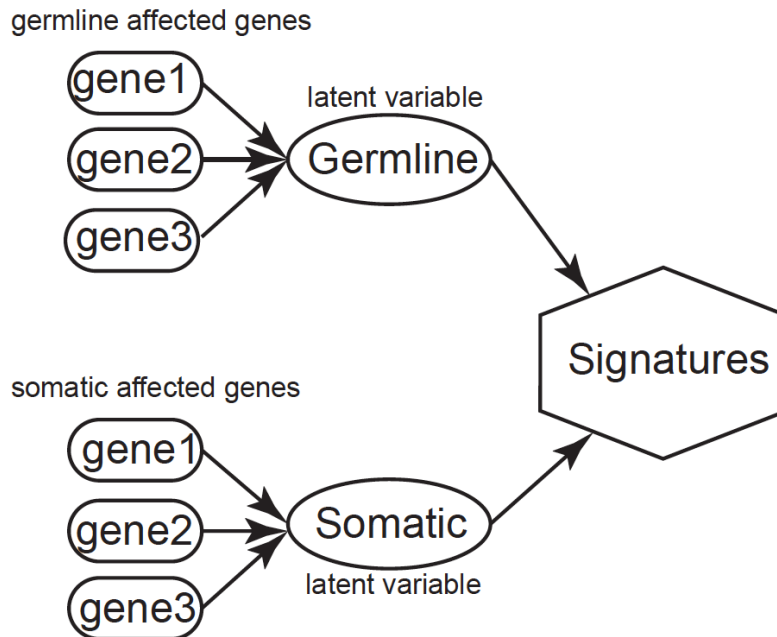

**Figure S1. A schema of Partial Least Squares Path Modeling analysis, related to Figure 2E.** Two latent variables are introduced, representing the combined effects of germline affected genes and somatic affected genes. The signatures indicate genome damage signatures, including tumor mutation burden, SNV, and indel neoantigen loads.

### Germline DDR Associations in Non-hypermutators

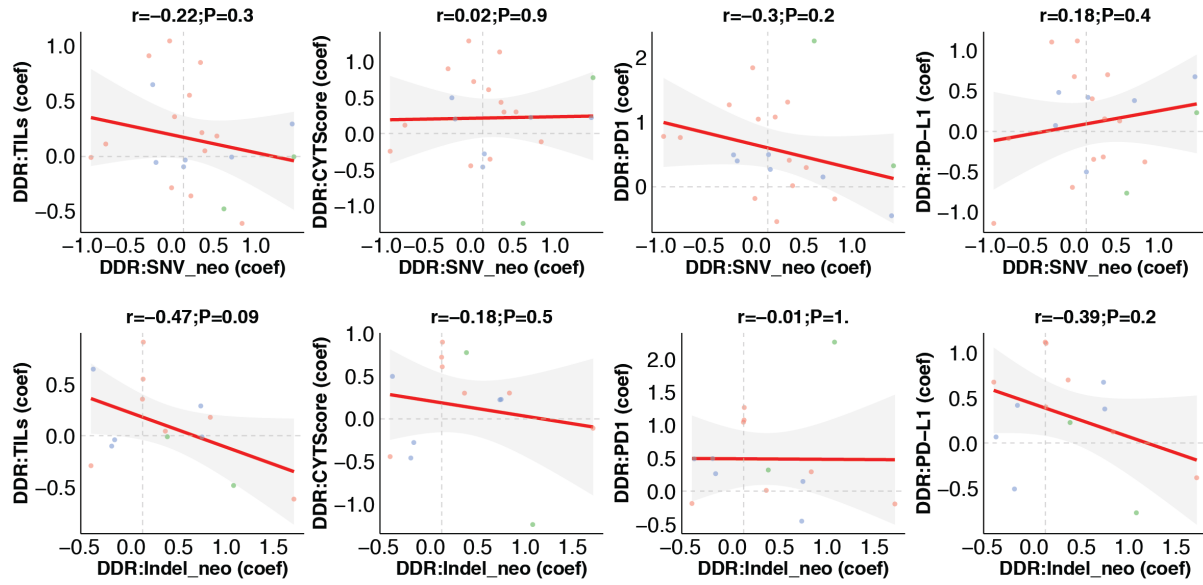

**Figure S2. The association between germline DNA damage repair and tumor immune response in non-hypermutated cases, related to Figure 4.** A-D. Comparisons of the correlation coefficients of germline DDR versus SNV neoantigen load with the germline DDR versus immune signature, including A. TILs, B. CYT score, C. *PD1* expression, and D. *PD-L1* expression. E-H. Comparisons of the correlation coefficients of germline DDR versus Indel neoantigen load with the germline DDR versus immune signature, including E. TILs, F. CYT score, G. *PD1* expression, and H. *PD-L1* expression. The  $r$  represents the Pearson correlation coefficient. Color of the dot represents the DDR pathways, including MMR (*MLH1*, *MSH2*, *MSH3*, *MSH6*, and *PMS2*), HR (*BRCA1/2*, *PALB2*), Sensor (*ATM*, *ATR*, and *CHEK2*) and Polymerase (*POLE* and *POLQ*). The axes indicate the correlation coefficients (coef) of linear regression adjusted by patients' age and genetic components ( $immune\ signature/neoantigen\ load \sim germline\ DDR\ variants + Age + PC1 + PC2$ ).

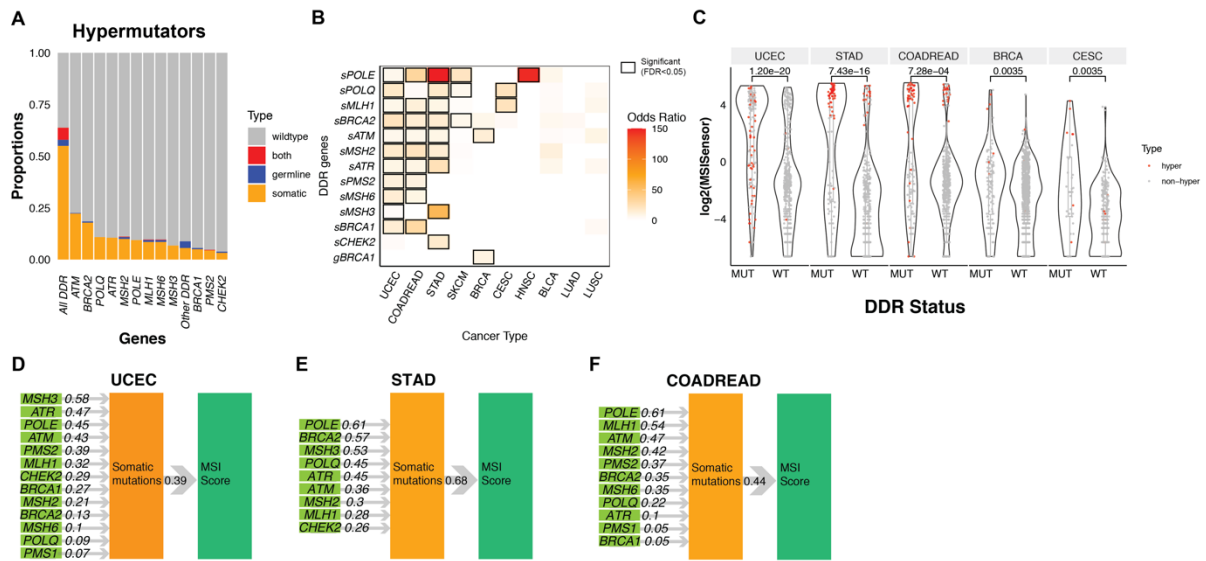

**Figure S3. The effect of germline and somatic DNA damage repair mutations on hypermutator and microsatellite instability, related to Figure 2 & 3.** **A.** The frequency of hypermutators carrying germline variants or somatic mutations in any of the 80 DDR genes. **B.** The enrichment of 13-prioritized DDR gene mutations in hypermutators, where the FDR was calculated based on results of two-side Fisher's exact tests. Only cancer types with at least one FDR<0.15 were shown. **C.** The comparison of MSISensor scores in DDR mutated and wildtype samples in each cancer type based on the Wilcox-rank-sum test. The numbers on the top of the violin plots denote FDRs resulting from the comparison. Only show cancer types with FDR<0.05 were shown. **D-F.** PLS-PM models of somatic mutations of DDR genes and MSI score (germline level was only show, because no significant association was identified in the germline level), including **D.** UCEC, **E.** STAD, **F.** COADREAD. The numbers indicated correlation coefficients identified by the PM-PLS model. Coefficients between germline variant/somatic mutation nodes and MSI nodes indicate the combined associations of the listed DDR genes.

**A**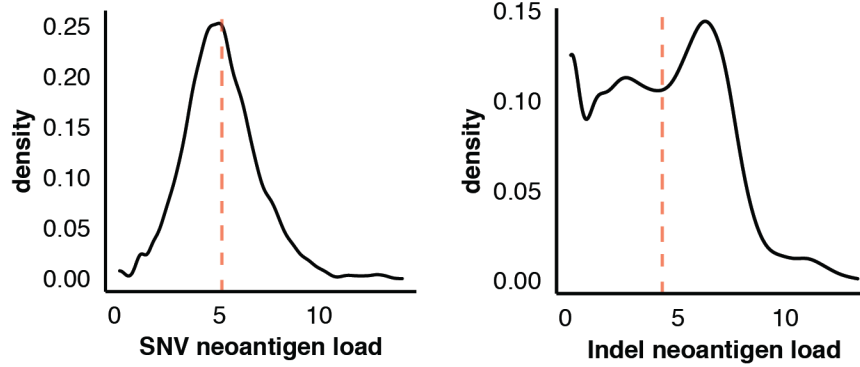**B**

**COADREAD**  
Odds Ratio=46.5 ,  $P < 2.2e-16$

|                 | SNV Neo High  | SNV Neo Low    |
|-----------------|---------------|----------------|
| MLH1-deficiency | 54<br>(11.2%) | 4<br>(1.0%)    |
| MLH1-wildtype   | 79<br>(16.4%) | 344<br>(71.4%) |

**COADREAD**  
Odds Ratio=19.1 ,  $P = 1.46e-14$

|                 | Indel Neo High | Indel Neo Low  |
|-----------------|----------------|----------------|
| MLH1-deficiency | 51<br>(11.5%)  | 4<br>(0.9%)    |
| MLH1-wildtype   | 155<br>(35.0%) | 233<br>(52.6%) |

**Figure S4. Neoantigen load and immunogenicity of *MLH1*-deficiency tumor, related to Figure 6.**  
**A.** The distribution of log<sub>2</sub>-scale SNV and indel neoantigen load. The red line indicates the average neoantigen load for stratifying neoantigen high and low samples. **B.** contingency tables for *MLH1*-deficiency (germline variants, somatic mutations, and DNA methylation) and SNV/indel neoantigens. *P*-values were calculated by two-sided Fisher exact test.

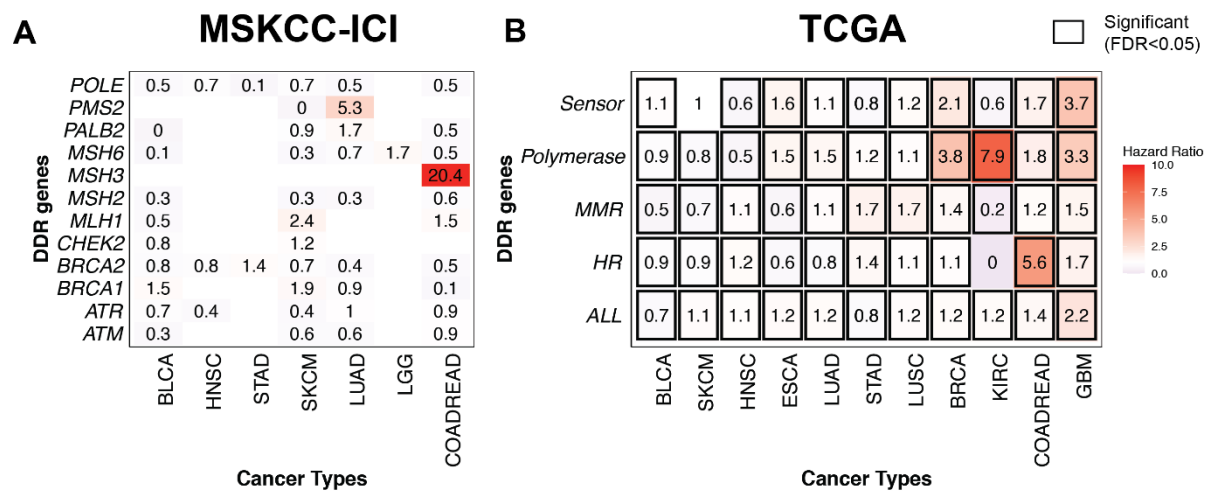

**Figure S5. Associations between patients' outcome and somatic mutations of the 13-prioritized DDR genes, related to Figure 7. A.** The heatmap shows the hazard ratio of individual DDR genes in the MSKCC ICI treatment cohort. The X-axis represents cancer types, and the Y-axis represents somatic mutations in each prioritized DDR gene. **B.** The heatmap shows the hazard ratio of DDR pathways in the MSKCC ICI treatment cohort. The Y-axis represents somatic mutations in DDR pathways of prioritized DDR genes, including Mismatch Repair (MMR), Homologous Recombination (HR), Damage Sensor (Sensor), DNA Polymerase (Polymerase), and all the 13-prioritized DDR genes (ALL). The value in each cell denotes the hazard ratio. The hazard ratio > 1 and < 1 suggests the association of DDR mutations with worse and better survival, respectively. Hazard ratio and *P* values were calculated using multivariable Cox proportional hazards models. Black boxes indicate FDR meet the criteria of less than 0.05 (significant).

**Supplementary Table1: TCGA samples, related to Figure 1.**

| <b>NO.</b> | <b>Cancers</b>                                                   | <b>Abbreviation</b> | <b># All Samples</b> | <b># Hypermutators</b> |
|------------|------------------------------------------------------------------|---------------------|----------------------|------------------------|
| 1          | Glioblastoma multiforme                                          | GBM                 | 390                  | 3                      |
| 2          | Ovarian serous cystadenocarcinoma                                | OV                  | 387                  | 1                      |
| 3          | Lung adenocarcinoma                                              | LUAD                | 515                  | 27                     |
| 4          | Lung squamous cell carcinoma                                     | LUSC                | 485                  | 16                     |
| 5          | Prostate adenocarcinoma                                          | PRAD                | 497                  | 2                      |
| 6          | Uterine Corpus Endometrial Carcinoma                             | UCEC                | 529                  | 51                     |
| 7          | Bladder Urothelial Carcinoma                                     | BLCA                | 411                  | 18                     |
| 8          | Testicular Germ Cell Tumors                                      | TGCT                | 129                  | 0                      |
| 9          | Esophageal carcinoma                                             | ESCA                | 184                  | 3                      |
| 10         | Pancreatic adenocarcinoma                                        | PAAD                | 177                  | 1                      |
| 11         | Kidney renal papillary cell carcinoma                            | KIRP                | 281                  | 0                      |
| 12         | Liver hepatocellular carcinoma                                   | LIHC                | 363                  | 3                      |
| 13         | Cervical squamous cell carcinoma and endocervical adenocarcinoma | CESC                | 289                  | 14                     |
| 14         | Sarcoma                                                          | SARC                | 236                  | 2                      |
| 15         | Breast invasive carcinoma                                        | BRCA                | 1012                 | 12                     |
| 16         | Thymoma                                                          | THYM                | 123                  | 1                      |
| 17         | Mesothelioma                                                     | MESO                | 82                   | 0                      |
| 18         | Colon Rectum adenocarcinoma                                      | COADREAD            | 527                  | 64                     |
| 19         | Stomach adenocarcinoma                                           | STAD                | 439                  | 67                     |
| 20         | Skin Cutaneous Melanoma                                          | SKCM                | 466                  | 44                     |
| 21         | Cholangiocarcinoma                                               | CHOL                | 36                   | 1                      |
| 22         | Kidney renal clear cell carcinoma                                | KIRC                | 368                  | 0                      |
| 23         | Thyroid carcinoma                                                | THCA                | 492                  | 0                      |
| 24         | Head and Neck squamous cell carcinoma                            | HNSC                | 507                  | 5                      |
| 25         | Brain Lower Grade Glioma                                         | LGG                 | 511                  | 1                      |
| 26         | Kidney Chromophobe                                               | KICH                | 66                   | 1                      |
| 27         | Uterine Carcinosarcoma                                           | UCS                 | 57                   | 2                      |
| 28         | Adrenocortical carcinoma                                         | ACC                 | 92                   | 2                      |
| 29         | Pheochromocytoma and Paraganglioma                               | PCPG                | 179                  | 0                      |
| 30         | Uveal Melanoma                                                   | UVM                 | 80                   | 0                      |
| 31         | Lymphoid Neoplasm Diffuse Large B-cell Lymphoma                  | DLBC                | 37                   | 0                      |
| 32         | Acute Myeloid Leukemia                                           | LAML                | 133                  | 1                      |

**Supplementary Table2: core DNA damage repair genes, related to Figure 1**

| <b>DNA Damage Repair Pathways</b>                              | <b>Genes</b>                                                                                                                  | <b>#Gene</b> |
|----------------------------------------------------------------|-------------------------------------------------------------------------------------------------------------------------------|--------------|
| Base Excision Repair (BER)                                     | APEX1,APEX2,FEN1,PARP1,POLB,TDG,TDP1,UNG                                                                                      | 8            |
| Nucleotide Excision Repair (NER, including TC-NER and GC-NER)) | CUL5,ERCC1,ERCC2,ERCC4,ERCC5,ERCC6,POLE, POLE3,XPA,XPC                                                                        | 10           |
| Mismatch Repair (MMR)                                          | EXO1,MLH1,MLH3,MSH2,MSH3,MSH6,PMS1,PMS2                                                                                       | 8            |
| Fanconi Anemia (FA)                                            | FANCA,FANCB,FANCC,FANCD2,FANCI,FANCL, FANCM,UBE2T                                                                             | 8            |
| Homologous Recombination (HR)                                  | BARD1,BLM,BRCA1,BRCA2,BRIP1,EME1,GEN1,MRE 11A,MUS81,NBN,PALB2,RAD50,RAD51,RAD52, RBBP8,SHFM1,SLX1A,TOP3A,TP53BP1,XRCC2, XRCC3 | 21           |
| Non-homologous End Joining (NHEJ)                              | LIG4,NHEJ1,POLL,POLM,PRKDC,XRCC4,XRCC5, XRCC6                                                                                 | 8            |
| Direct Repair (DR)                                             | ALKBH2,ALKBH3,MGMT                                                                                                            | 3            |
| Translesion Synthesis (TLS)                                    | POLN,POLQ,REV1,REV3L,SHPRH                                                                                                    | 5            |
| Damage Sensor etc.                                             | ATM,ATR,ATRIP,CHEK1,CHEK2,MDC1,RNMT, TOPBP1,TREX1                                                                             | 9            |
